# Supplementary material for: Boosting energy efficiency and selectivity of glucose oxidation toward glucuronic acid in high-frequency ultrasound using multicavity CuO catalytic cavitation agents
Source: Royal Society of Chemistry journal article supplement (doi:10.1039/d4gc03775h), 2024-10-03
Supplement: d4gc03775h1.pdf [file d4gc03775h1.pdf]

## Supporting Information

# Boosting energy efficiency and selectivity of glucose oxidation to glucuronic acid in high frequency ultrasound using multicavity CuO catalytic cavitation agents

Zhangyue Xie<sup>1</sup>, Valarmathi Mahendran<sup>2</sup>, Umesh Sai Jonnalagadda<sup>1</sup>, Qianwenhao Fan<sup>1</sup>, Xiaoqian Su<sup>1</sup>,  
Ari F. Fischer<sup>1,3</sup>, Mingwu Tan<sup>4</sup>, Longgang Tao<sup>4</sup>, François Jérôme<sup>2</sup>, James J. Kwan<sup>5</sup>, Sabine Valange<sup>2\*</sup>,  
Tej S. Choksi<sup>1\*</sup>, Prince N. Amaniampong<sup>2\*</sup>, Wen Liu<sup>1\*</sup>

<sup>1</sup> School of Chemistry, Chemical Engineering and Biotechnology, Nanyang Technological University 62 Nanyang Drive  
637459 (Singapore)

<sup>2</sup> Université de Poitiers, CNRS, Institut de Chimie des Milieux et Matériaux de Poitiers-IC2MP, ENSI Poitiers, B1, 1 rue  
Marcel Doré, 86073 Poitiers Cedex 9, (France)

<sup>3</sup> Cambridge Centre for Advanced Research and Education in Singapore (CARES), 1 Create Way, 138602 (Singapore)

<sup>4</sup> Institute of Sustainability for Chemicals, Energy and Environment, Agency for Science, Technology and Research  
(A\*STAR), 1 Pesek Road, Jurong Island, 627833, (Singapore)

<sup>5</sup>Department of Engineering Sciences University of Oxford, Parks Rd, Oxford, OX1 3PJ (United Kingdom)

\*wenliu@ntu.edu.sg

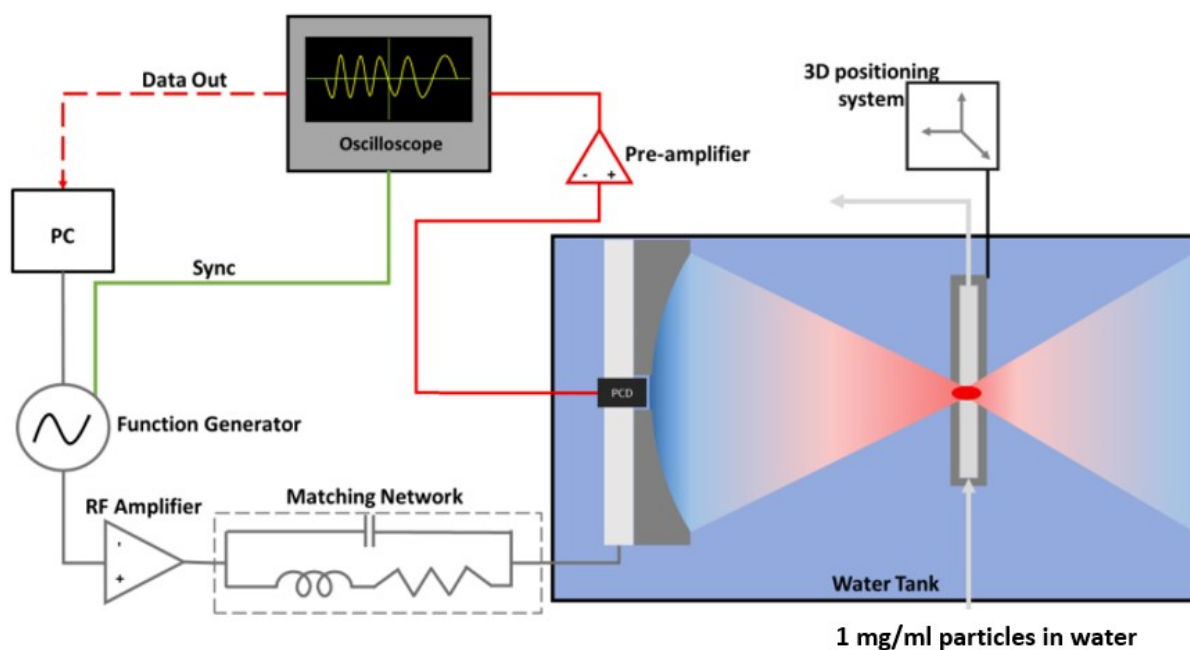

**Figure S1.** Schematic illustration of HIFU setup with flow chamber for acoustic response quantification.

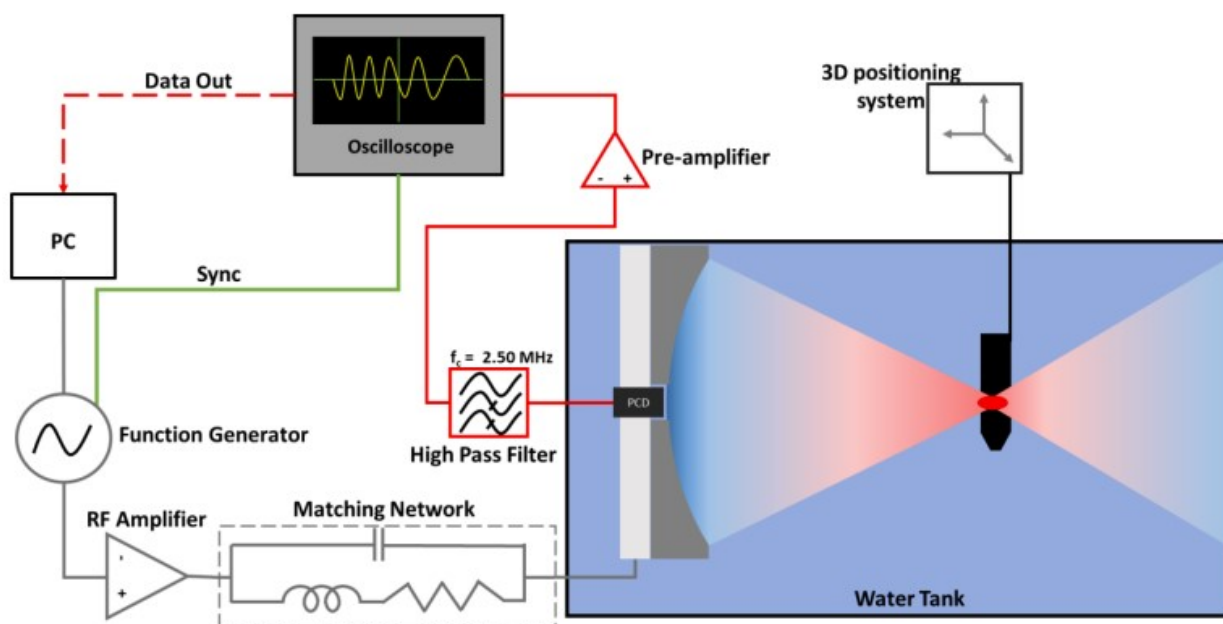

**Figure S2.** Schematic illustration of sonochemical glucose oxidation experimental setup.

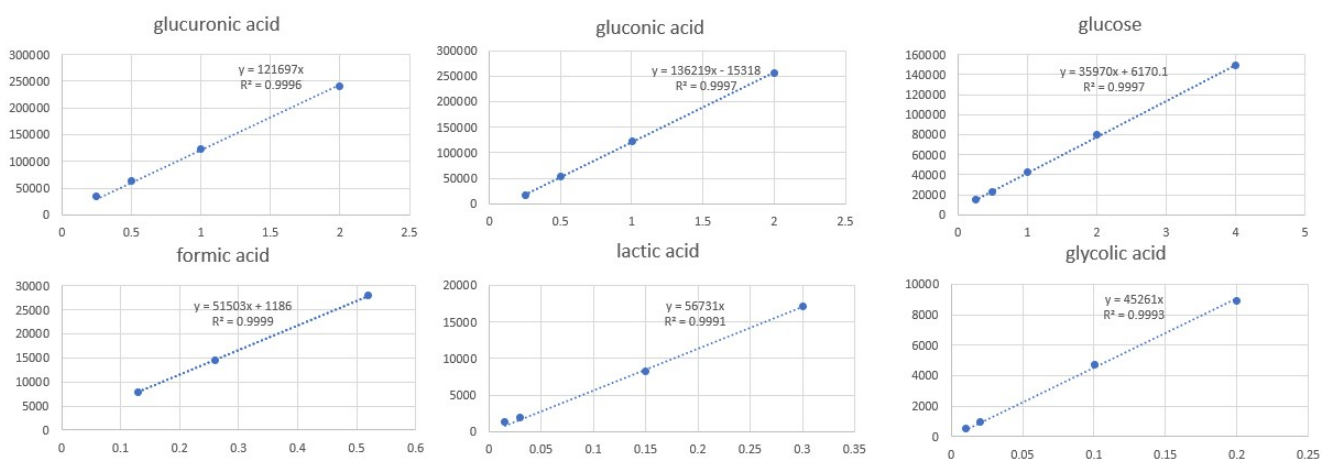

**Figure S3.** Standard curves of products and reactant.

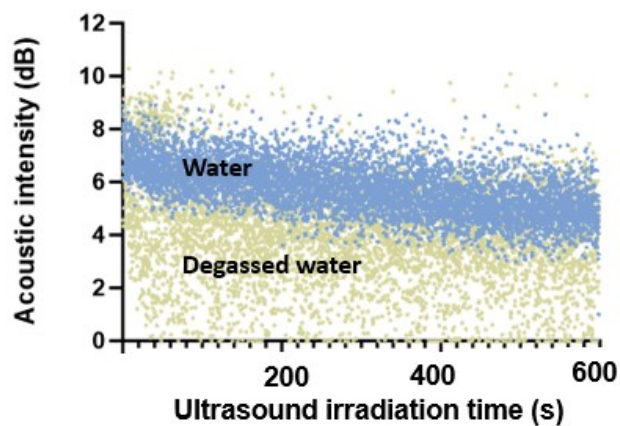

**Figure. S4** Broadband signal intensity under 4.23 MPa of degassed water compared to water.

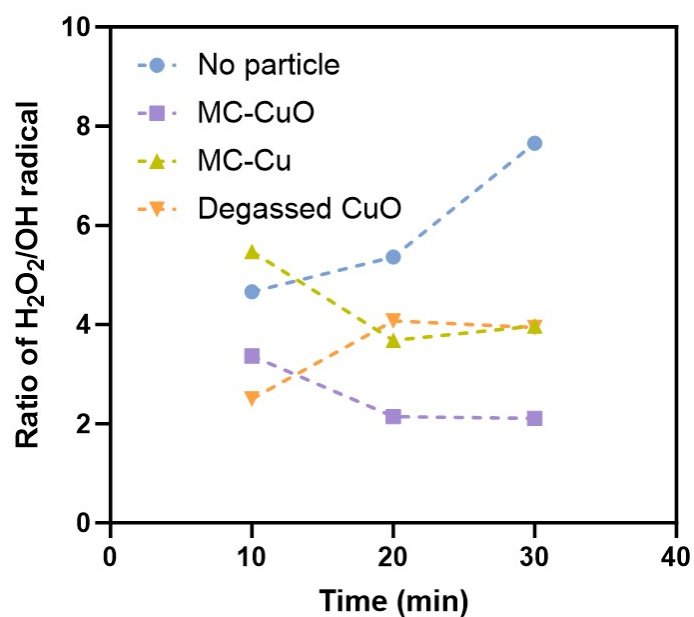

**Figure S5.** Ratio of H<sub>2</sub>O<sub>2</sub> and OH radical among different groups.

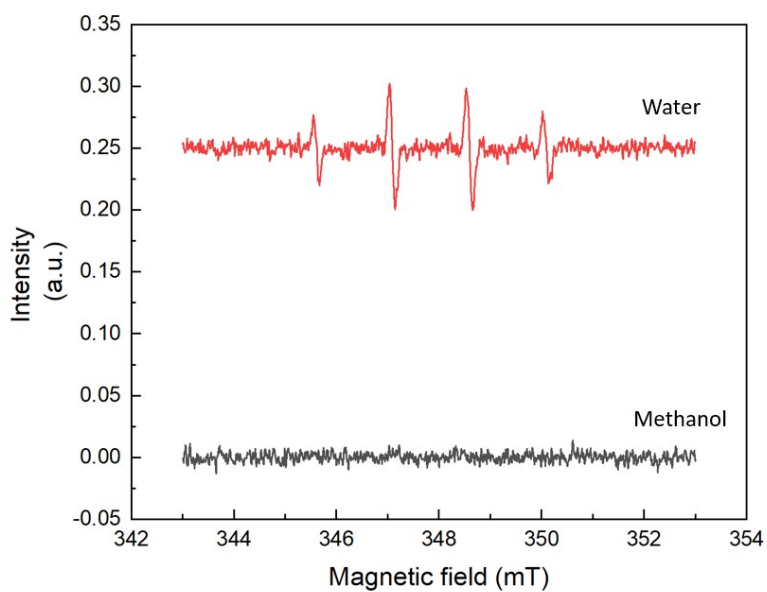

**Figure S6.** EPR signal under silent condition with H<sub>2</sub>O<sub>2</sub> and DMPO in water and methanol.

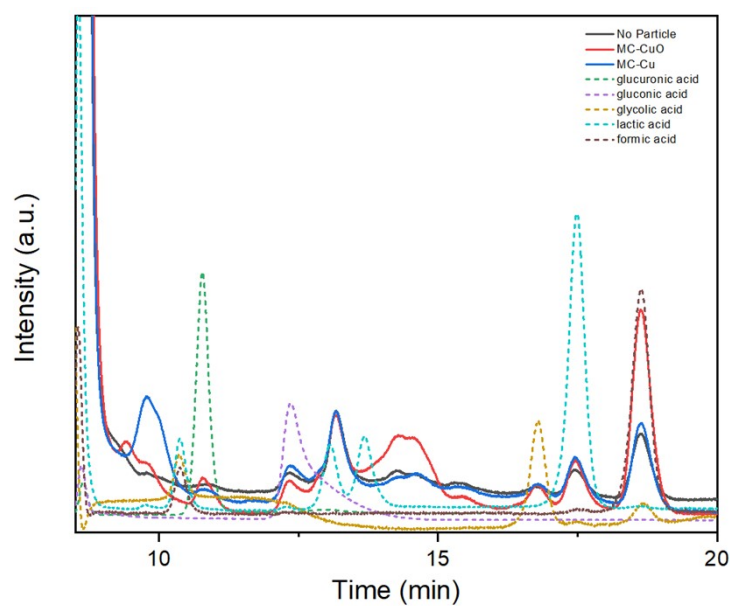

**Figure S7.** HPLC spectrum of products and product standards (standard lactic acid has two unknown peaks which can be due to polymerization).

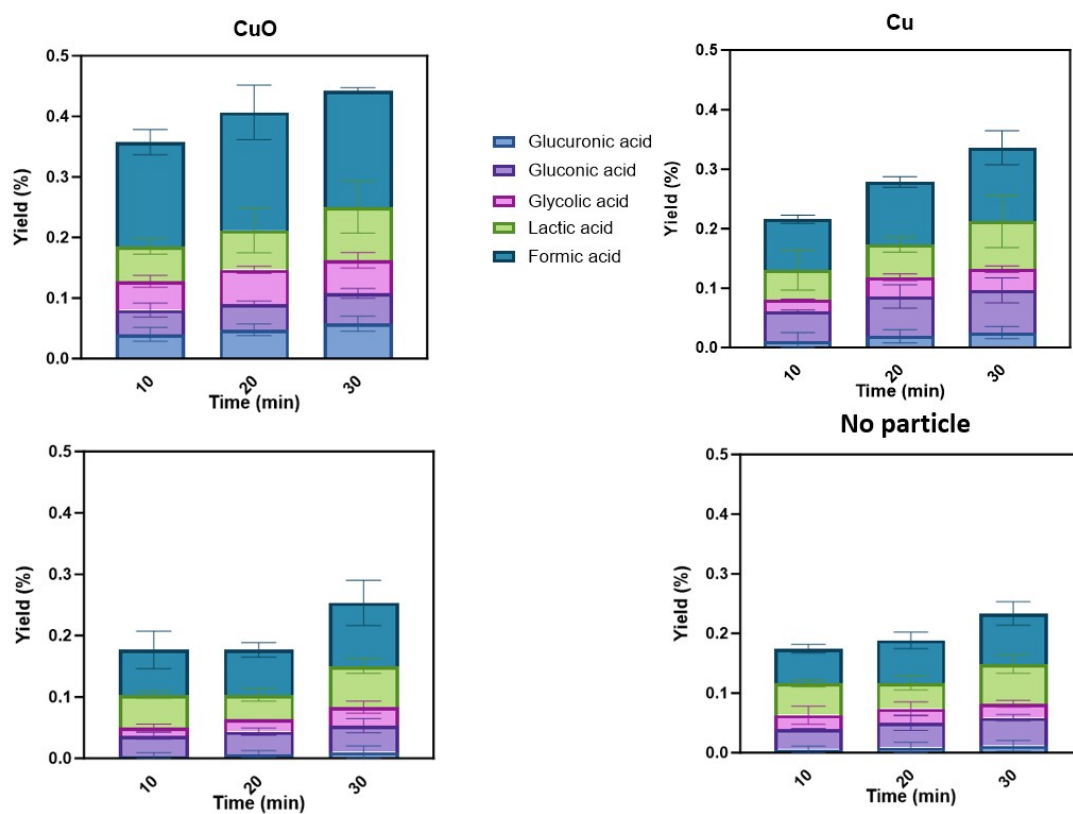

**Figure S8.** Fraction of products produced in different groups.

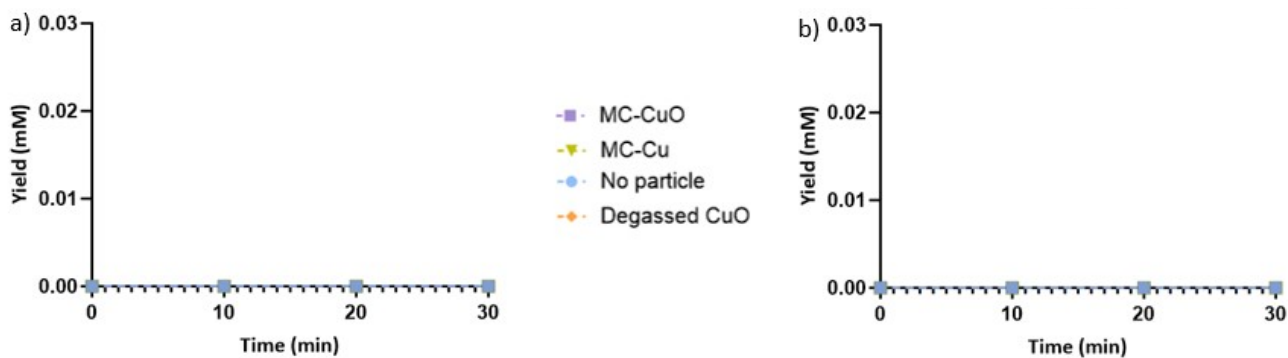

**Figure S9.** Sonoactivity of sonocatalysts under silent condition without ultrasound irradiation. The yield of glucuronic acid a), and yield of gluconic acid b).

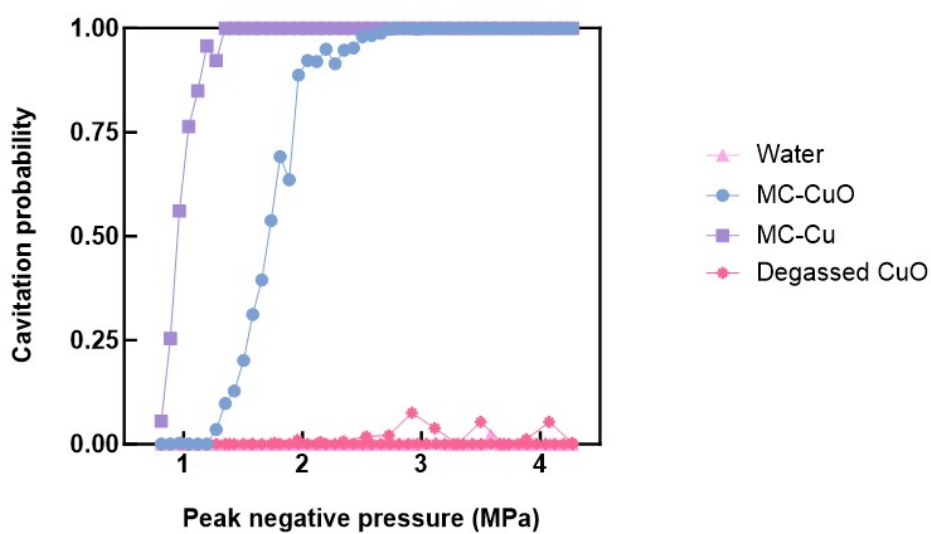

**Figure. S10** Acoustic properties of MC-CuO. a) Cavitation probability of the series of MC-CuO under acoustic pressure ramp.

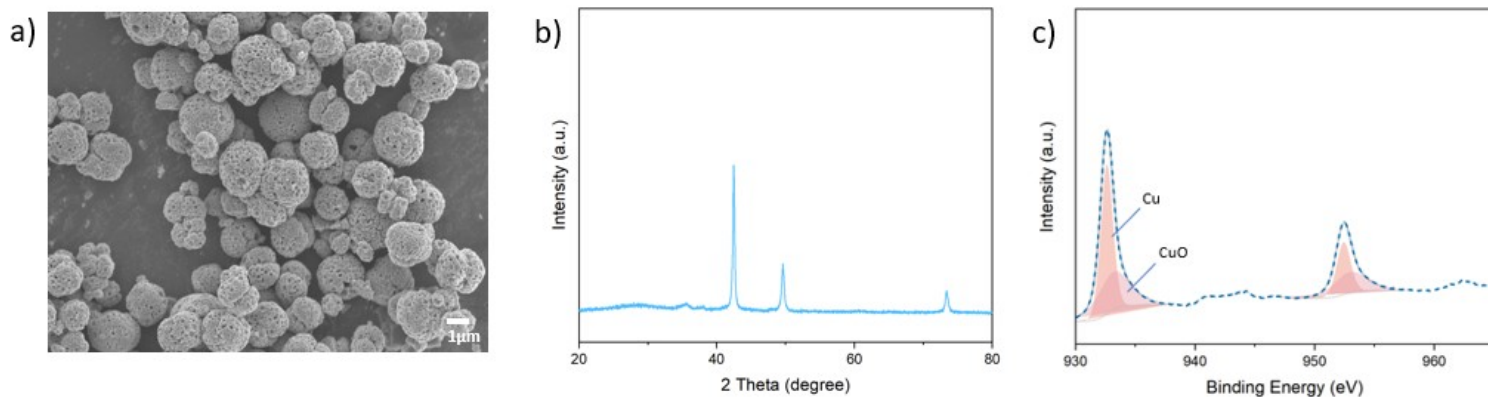

**Figure S11.** Morphological and crystal characterization of MC-Cu particles. SEM images of a) MC-Cu, b) XRD spectrum of the MC-Cu particles with reference spectrum, c) XPS spectrum of the MC-Cu particles.

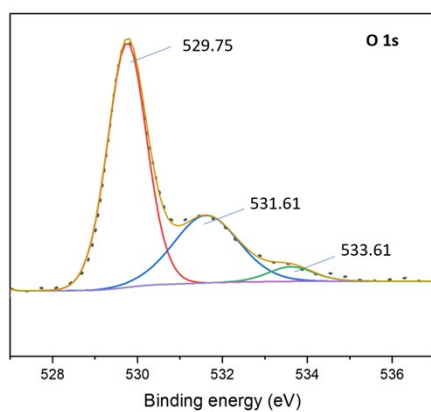

**Figure S12.** O 1s XPS spectrum of the as-prepared MC-CuO particle

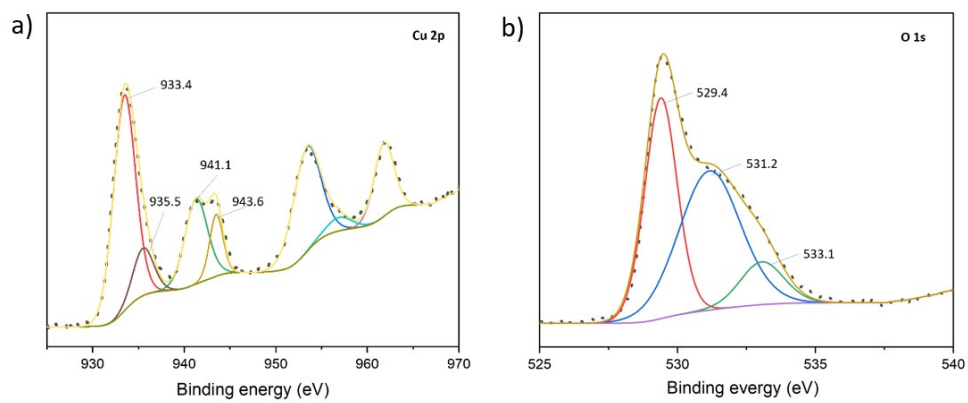

**Figure S13.** a) Cu 2p XPS of used MC-CuO; b) O 1s XPS of used MC-CuO.
